# Supplementary material for: Extracorporeal Shock Wave Rebuilt Subchondral Bone In Vivo and Activated Wnt5a/Ca2+ Signaling In Vitro
Source: PubMed Central journal article supplement (PMC5661093; doi:10.1155/2017/1404650), 2017-10-15
Supplement: 1404650.f1.pdf [file 1404650.f1.pdf]

1 Extracorporeal shock wave regenerates subchondral bone via activation  
2 of Wnt5a/Ca<sup>2+</sup> signaling in an osteoarthritis rat model

3 **Supplemental information**

4 **Method**

5 ***Cell isolation and cultures***

6 After anaesthesia, 4-week-old Sprague-Dawley rats were sacrificed and immersed in 75%  
7 alcohol for 5 minutes. BMMSCs were isolated from the bilateral femurs and tibias, and then was  
8 inoculated in the culture flask (Corning incorporated , USA) with the density of  $1 \times 10^9 \text{L}^{-1}$   
9 cells/cm<sup>2</sup> at the condition of 37°C, 5% CO<sub>2</sub>. Half of the medium was changed at the first 24 hours,  
10 and then changed every three days. The BMMSCs were digested by 0.25% trypsin (Beyotime  
11 Biotechnology, China) and passaged after the area of culture bottle was covered approximately  
12 80% to 90%. The second generation of BMMSCs was used in the experiments.

13 ***Cell counting***

14 After the BMMSCs confluency reached to 90%, the experiment group was treated with  
15 different ESW energy levels (0.2bar, 0.4bar and 0.6bar, 1000s), and the control group were treated  
16 the same with the experiment group except ESW intervention. After treatment, BMMSCs were  
17 washed with phosphate-buffered saline (PBS) for three times, then received 500μL cell counting  
18 kit 8 each well, and were incubated for 30 minutes. 30μL supernatant was sucked out and  
19 transferred from 6-well-plate to 96-well-plate. The absorbance of 490nm was detected in the  
20 microplate reader. The number of cells was calculated according to the standard curve.

21  
22 **Result**

23 ***ESW with 0.8 bar and 1.0 bar for 1000 shots was abandoned for treating BMMSCs***

24 Low energy ESW had little effect on the survival of BMMSCs, whilst high energy ESW led  
25 to increased apoptosis. The DolorClast Swiss was used to generate the pneumatic ballistic shock  
26 wave, producing a 60 degree sector effective area with a radius of 4 cm (Fig.S1.B). To study the  
27 energy level of ESW *in vitro*, we first studied the effect of ESW on rat BMMSCs. ESW energy of

28 0.6 bar at a frequency of 1000 shots (s), was found to be safe. BMMSCs were collected and  
29 assessed for morphological changes, with no significant differences identified (3–5%,  $p < 0.05$ ).  
30 When ESW energy was increased to 0.8 and 1.0 bar, a large number of cells detached from the  
31 culture plate and appeared unviable (Fig. S1.A). To further confirm the effects of the ESW energy  
32 range (0–1.0 bar) on cell survival, 30 min after ESW intervention, cells were stained with calcein,  
33 propidium iodide (PI) and the Cell Counting Kit-8 (CCK-8) for relative quantification (Fig.S1.A  
34 and Fig.S1.E). The results showed that at 0.8 and 1.0 bar ESW led to cell death, but at 0.2, 0.4 and  
35 0.6 bar ESW had no effect on cell proliferation and viability.

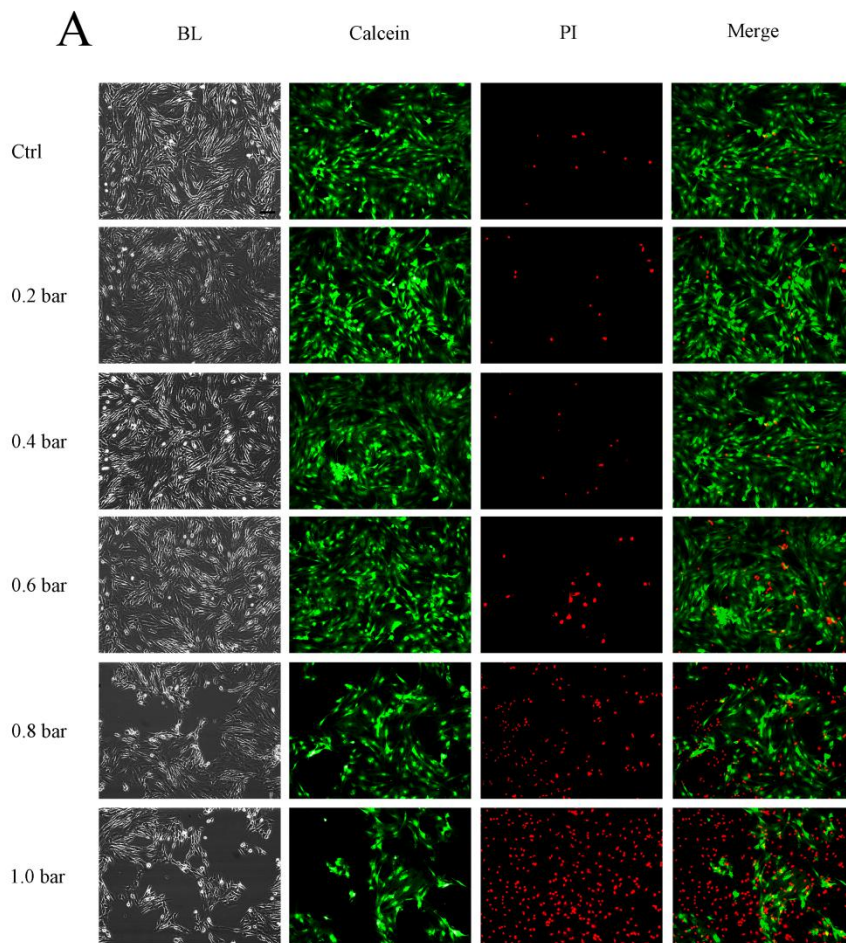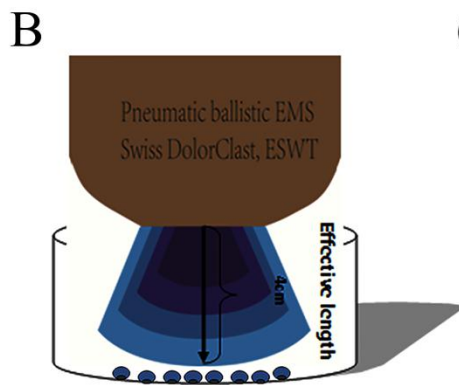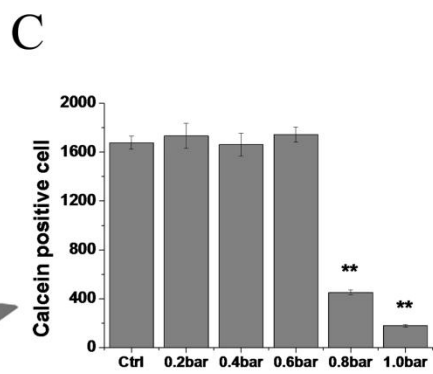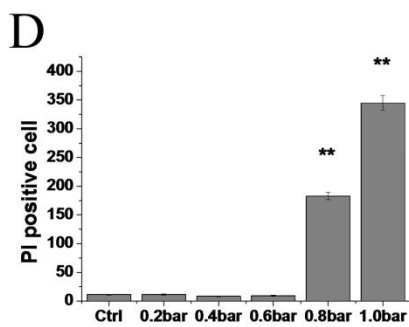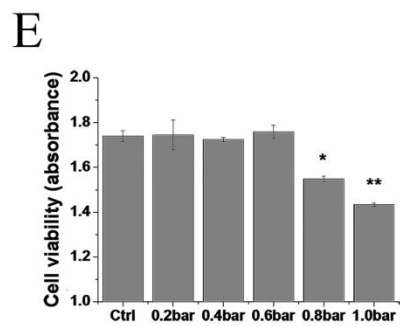

37

38 **Fig.S1. Quantitative cell viability assay in the absence and presence of ESW stimulation..**

39 (A) Effect of ESW energy level on BMMSC survival. Images were taken under different  
40 conditions (gray images: bright light; green: calcein staining, and red: PI staining). Scale bar = 100  
41  $\mu\text{m}$ . (B) Schematic description of the ESW stimulation assay. Cell culture medium (10% FBS)  
42 height close to the upper edge of the plate. The shock wave probe just touched the liquid of the  
43 plate and vertical interference was performed on the cells. The effective radius of the shock wave  
44 in the liquid was 4 cm. (C) Quantitative calcein staining for cell viability. BMMSCs were seeded  
45 into plates. Thirty minutes after ESW intervention, calcein or PI stain was added, and cells were  
46 counted under a fluorescence microscope using a  $\times 10$  objective. Histogram shows the  
47 calcein-positive cell number. (D) Histogram shows the PI-positive cell number. (E) Cell relative  
48 activity assay. CCK-8 was used to detect the relative activity of the cells. \* $p < 0.05$  and \*\* $p < 0.01$   
49 compared with control (error bar is SEM).

50

Table S1. Mankin score of OA pathological grading

| Score | Tissue structure                 | Cells                       | Matrix staining       | Structural integrity of tide line |
|-------|----------------------------------|-----------------------------|-----------------------|-----------------------------------|
| 0     | normal                           | normal                      | normal                | integral                          |
| 1     | irregular surface                | cell increased<br>diffusely | mild reduction        | broken                            |
| 2     | pannus and irregular<br>surface  | local cells<br>increased    | moderate<br>reduction |                                   |
| 3     | cracks in the transition<br>zone | cell apoptosis              | severe reduction      |                                   |
| 4     | cracks in the radiation<br>belt  |                             | not colored           |                                   |
| 5     | cracks in the calcified<br>zone  |                             |                       |                                   |

51

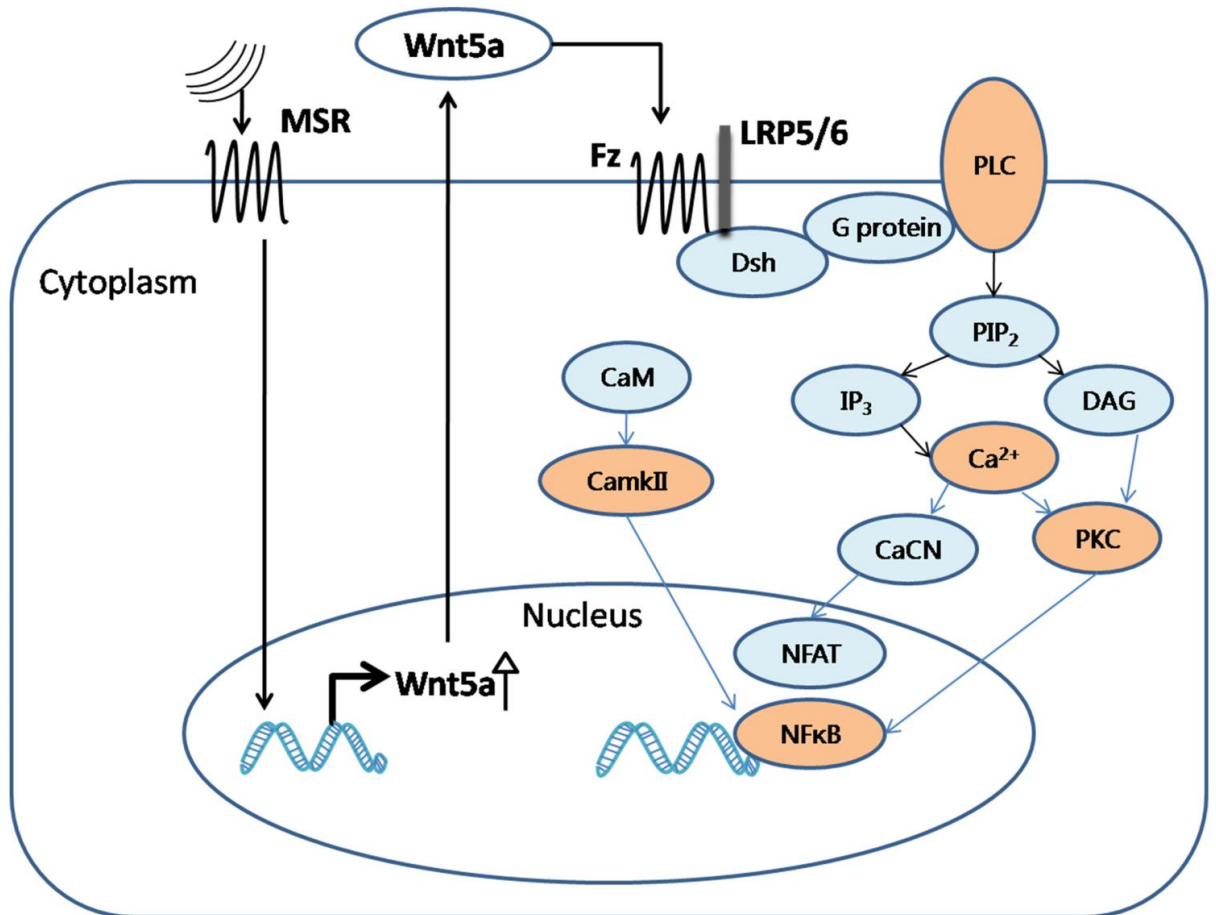

52

53 **Fig.S2. Proposed model for the Wnt5a/Ca<sup>2+</sup> signaling pathway in moderating expression of**  
 54 **related proteins.** Expression of Wnt5a is up-regulated following the activation of mechanically  
 55 sensitive receptors on the cell surface. Wnt5a protein then combines with disheveled (Dsh), a  
 56 member of the frizzled (Fz) family, by an autocrine or paracrine mechanism. This in turn causes  
 57 the intracellular Ca<sup>2+</sup> concentration to increase which activates PKC, PLC and CamkII. This  
 58 induces activation of NFAT and NF-κB through a series of processes, which initiates gene  
 59 transcription of corresponding sequences.

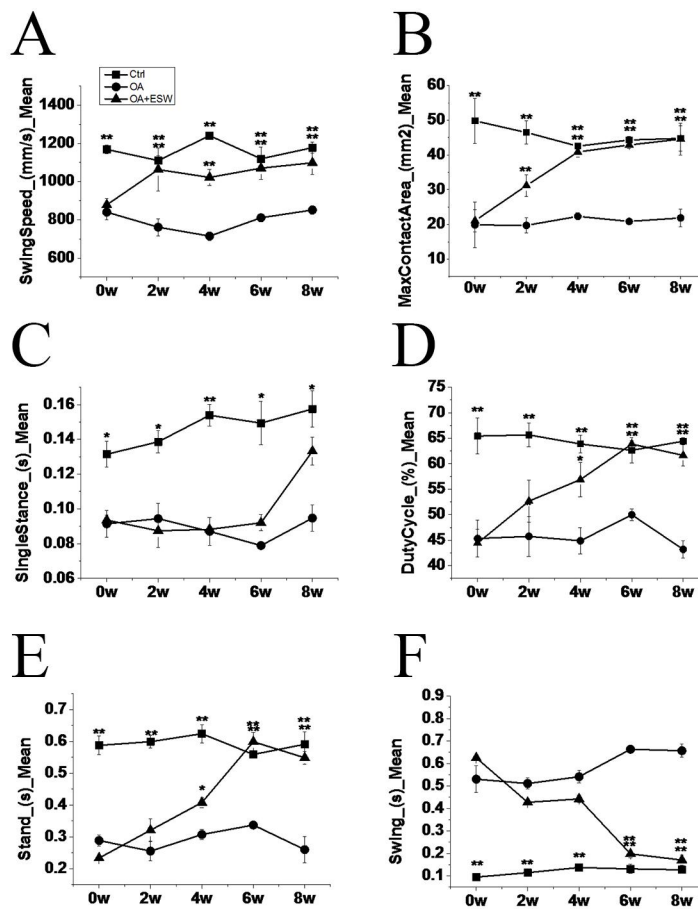

60

61 **Fig.S3.** Gait parameters obtained from the CatWalk analysis for each group. Some results were show at  
 62 **Fig.1.** And the data above was additional. Values presented are mean  $\pm$  95% confidence interval of the  
 63 corresponding numerical. There is no difference between OA and OA+ESW in the gait parameters of Single  
 64 Stance(n=12, \*  $P<0.05$ ). With the OA group significant differences are present for all the other five gait  
 65 parameters (n=12, \*  $P<0.05$ ) except for Duty Cycle and Stand on 0w and 2w, Max Contact Area on 0w and Swing  
 66 on 0w, 2w and 4w. Error bar is standard error of mean [SEM].

67

68
